1  
2  
3  
4  
5 **Title**

6  
7 Sociodemographic patterning in the oral microbiome of a diverse sample of New Yorkers

8  
9  
10 **Authors**

11 Audrey Renson,<sup>1,2</sup> Heidi E. Jones<sup>1</sup>, Francesco Beghini,<sup>3</sup> Nicola Segata,<sup>3</sup> Christine P. Zolnik,<sup>4,5</sup> Mykhaylo  
12 Usyk,<sup>4</sup> Thomas U. Moody,<sup>4,6</sup> Lorna Thorpe,<sup>7</sup> Robert Burk,<sup>4,8</sup> Levi Waldron,<sup>†1,9</sup> Jennifer B. Dowd<sup>†1,10</sup>

13  
14 <sup>1</sup> Graduate School of Public Health and Health Policy, City University of New York, Department of  
15 Epidemiology and Biostatistics, New York, NY, USA

16  
17 <sup>2</sup> Department of Epidemiology, Gillings School of Global Public Health, University of North Carolina,  
18 Chapel Hill, NC, USA

19 <sup>3</sup> Centre for Integrative Biology, University of Trento, Trento, Italy

20 <sup>4</sup> Department of Pediatrics, Albert Einstein College of Medicine, Bronx, NY, USA

21 <sup>5</sup> Department of Biology, Long Island University, Brooklyn, NY 11201, USA

22 <sup>6</sup> Immunology Program, Sloan Kettering Institute, Memorial Sloan Kettering Cancer Center, New York,  
23 NY 10065, USA.

24 <sup>7</sup> NYU School of Medicine, Department of Population Health, New York, NY, USA

25 <sup>8</sup> Departments of Microbiology and Immunology, Epidemiology and Population Health, and Obstetrics,  
26 Gynecology and Women's Health, Albert Einstein College of Medicine, Bronx, NY 10461, USA

27 <sup>9</sup> Institute for Implementation Science in Population Health, City University of New York, New York, USA

28 <sup>10</sup> King's College London, Department of Global Health and Social Medicine, London, UK

29  
30  
31 † equal contribution

32  
33  
34 **Corresponding Author Contact Info**

35 Audrey Renson

36 Email: [arenson@ad.unc.edu](mailto:arenson@ad.unc.edu)

37 Phone: 347-743-4927

38  
39 Permanent Address: 100 South Peak Drive, Carrboro, NC, USA 27510  
40  
41  
42  
43  
44  
45  
46  
47  
48  
49  
50  
51  
52  
53  
54  
55  
56

## 1 Abstract

### 2 1.1 Purpose

3 Variations in the oral microbiome are potentially implicated in social inequalities in oral disease,  
4 cancers, and metabolic disease. We describe sociodemographic variation of oral microbiomes  
5 in a diverse sample.

### 6 1.2 Methods

7 We performed 16S rRNA sequencing on mouthwash specimens in a subsample (n=282) of the  
8 2013-14 population-based New York City Health and Nutrition Examination Study (NYC-HANES).  
9 We examined differential abundance of 216 operational taxonomic units (OTUs), and alpha and  
10 beta diversity by age, sex, income, education, nativity, and race/ethnicity. For comparison, we  
11 also examined differential abundance by diet, smoking status, and oral health behaviors.

### 12 1.3 Results

13 69 OTUs were differentially abundant by any sociodemographic variable (false discovery rate <  
14 0.01), including 27 by race/ethnicity, 21 by family income, 19 by education, three by sex. We  
15 also found 49 differentially abundant by smoking status, 23 by diet, 12 by oral health behaviors.  
16 Genera differing for multiple sociodemographic characteristics included *Lactobacillus*,  
17 *Prevotella*, *Porphyromonas*, *Fusobacterium*.

### 18 1.4 Conclusions

19 We identified oral microbiome variation consistent with health inequalities, with more taxa  
20 differing by race/ethnicity than diet, and more by SES variables than oral health behaviors.  
21 Investigation is warranted into possible mediating effects of the oral microbiome in social  
22 disparities in oral, metabolic and cancers.

### 23 Keywords

24 oral microbiome; health disparities; demographics; social epidemiology

### 25 List of abbreviations

26 SES, socioeconomic status; CHD, coronary heart disease; CVD, cardiovascular disease; NYC HANES, New  
27 York City Health and Nutrition Examination Survey; OTU, operational taxonomic unit; FDR, false  
28 discovery rate; PS, prediction strength; logFC, log fold change; HMP, Human Microbiome Project

## 1 Highlights

- 2 • Most microbiome studies to date have had minimal sociodemographic variability,  
3 limiting what is known about associations of social factors and the microbiome.
- 4 • We examined the oral microbiome in a population-based sample of New Yorkers with  
5 wide sociodemographic variation.
- 6 • Numerous taxa were differentially abundant by race/ethnicity, income, education,  
7 marital status, and nativity.
- 8 • Frequently differentially abundant taxa include *Porphyromonas*, *Fusobacterium*,  
9 *Streptococcus*, and *Prevotella*, which are associated with oral and systemic disease.
- 10 • Mediation of health disparities by microbial factors may represent an important  
11 intervention site to reduce health disparities, and should be explored in prospective  
12 studies.

## 2 Introduction

Health disparities by race/ethnicity, socioeconomic status (SES), sex, and other

sociodemographic factors have long been observed but their mechanisms have yet to be fully elucidated. In particular, racial/ethnic and socioeconomic disparities have been consistently observed in oral health outcomes (1), cardiovascular disease (CVD) (2, 3), diabetes (4), preterm birth and low birth weight (5, 6), and rheumatoid arthritis (7).

Variations in human oral microbiome structure and function have been associated with oral disease (8, 9), as well as a wide range of systemic illnesses including CVD (10-12), diabetes (13, 14), cancers (15-18), birth outcomes (19, 20), and rheumatoid arthritis (21, 22). Hypothesized pathways for such associations include both direct virulence and modulation of systemic immune response (15), although causal evidence is limited. Also, regardless of their causal role, the microbiota represent potentially useful biomarkers for early disease detection and risk prediction.

This combination of findings has led researchers to call for investigation into the role of the microbiome in health disparities (23) but little empirical work has yet been done in this area. A number of mechanisms potentially link social inequality to the microbiome (24). Mechanisms linking the social environment to microbe exposure have been discussed in relation to common pathogens such as CMV and EBV; these may include household crowding, use of public transportation, and differences in susceptibility due to e.g. breastfeeding (antibodies) and poor sleep (25, 26), mechanisms which may apply to commensal microbes as well. Changes in immune function related to psychosocial stress (27), nutrition (28), smoking (29), or other environmental exposures can alter host interactions with microbes. Differences in microbiome characteristics may also persist via mother-to-child transmission, as infant microbiomes are seeded from the birth canal and/or breastfeeding (30, 31). Further, social network homophily and shared built environments may represent reservoirs of shared microbiota membership (32).

So far, limited research has examined sociodemographic associations with the oral microbiome. The Human Microbiome Project (HMP) collected microbiome samples at nine distinct oral sites on a volunteer sample in the U.S. with minimal race/ethnic variability (approx. 80% white) (33, 34). Nonetheless, the HMP found differentially abundant taxa comparing non-Hispanic white, non-Hispanic black, Asian, Mexican, and Puerto Rican ethnicities (35). In another U.S. volunteer sample, distinct subgingival microbiomes were identified by race/ethnicity, with non-Hispanic blacks having lower microbiome diversity than other groups (36). In a comparison of salivary microbiomes of Cheyenne and Arahapo vs. non-Native individuals in the U.S., strong bacterial

1 species composition clustering, differences in species richness, and numerous differentially  
2 abundant taxa were found by ethnicity (37). Several low-throughput studies examining specific  
3 periodontal pathogens found significant differences in abundance and/or presence by  
4 race/ethnicity (38-40). To our knowledge, only one study has tested associations between SES  
5 and the oral microbiome, finding substantial differences (20% of variation) by municipal-level  
6 SES in the Danish Health Examination Survey (41).

7 In order to explore the relationship between the oral microbiome and health disparities,  
8 population-level sociodemographic associations must be assessed. Our aim was to assess  
9 sociodemographic variation in the human salivary microbiome. Specifically, we examined  
10 whether bacterial taxa were differentially abundant, and whether variation existed in alpha and  
11 beta diversity by sociodemographic characteristics using high-throughput sequencing data from  
12 a population-based sample.

### 13 **3 Methods**

#### 15 **3.1 Data Source**

16 Samples came from the 2013-14 New York City Health and Nutrition Examination Survey (NYC  
17 HANES-II) previously described (42). Briefly, the 2013-14 NYC HANES was the second  
18 population-representative, cross-sectional survey of adult NYC residents, using a three-stage  
19 cluster sampling design. Overall response rate was 36% (n=1524). Eligible participants  
20 completed a two-part interview, physical examination, and blood, urine, and oral mouthwash  
21 biospecimen collection. Nearly all participants (95%) provided an oral mouthwash specimen.  
22 This study was approved by the institutional review boards of the City University of New York  
23 and the New York City Department of Health and Mental Hygiene, and all participants gave  
24 informed consent. Participants providing mouthwash specimens in the current sub-study also  
25 consented to use these specimens in future studies.

#### 26 **3.2 Subsample Selection**

27 The current study uses 297 NYC HANES participants selected to examine oral microbiome  
28 associations with tobacco use, as described elsewhere [CITATION PENDING – Beghini 2018  
29 Companion Paper]. Briefly, we selected the 90 self-reported current cigarette smokers with the  
30 highest serum cotinine, 45 randomly selected never smokers with serum cotinine <0.05 ng/mL,  
31 45 randomly selected former smokers with serum cotinine <0.05 ng/mL, all 38 former and  
32 never smokers with serum cotinine between 1 and 14 ng/mL, and 79 participants reporting

281  
282  
283 1 usage of hookah, cigar, cigarillo and/or e-cigarette in the last 5 days. Descriptive statistics in the  
284 2 subsample and overall NYC HANES sample are presented in Table 1.

### 287 3 **3.3 Oral rinse collection and microbiome sample processing**

288  
289 4 Participants were asked to fast for 9 hours prior to oral rinse collection. A 20-second oral rinse  
290 5 was divided into two 5-second swish and 5-second gargle sessions using 15 mLs of Scope®  
291 6 mouthwash. After each session, participants expectorated the rinse into a sterile cup. Timers  
292 7 built into the computer-assisted personal interview program signaled the timing of the swish,  
293 8 gargle and expectoration. Oral rinse specimens were stored cold before delivery to the New  
294 9 York Public Health Laboratory where they were transferred into 50 mL centrifuge tubes, frozen  
295 10 and stored at -80°C. The oral rinse samples were then transported on dry ice to Albert Einstein  
296 11 College of Medicine, where they were stored at -80°C until processing.

300 12 Specimen processing and sequence analysis methods are described in detail in the appendix.  
301 13 Briefly, we extracted DNA using QIAamp DNA mini kit (QIAGEN), and amplified DNA in the V4  
302 14 region of the 16S rRNA using primers 16SV4\_515F (GTGYCAGCMGCCGCGGTA) and 16SV4\_806R  
303 15 (GGACTACHVGGGTWTCTAAT) (38,39), followed by amplicon sequencing using a MiSeq  
304 16 (Illumina, San Diego, CA) with 2x300 paired-end fragments. We analyzed 16S reads using QIIME  
305 17 version 1.9.1 (40) and Phyloseq (41). We merged raw Illumina paired-end reads using the QIIME  
306 18 command fastq-join (42), and discarded any resulting low quality reads (PHRED score < 30)  
307 19 when joining the split reads (qiime split\_libraries\_fastq.py). We performed open-reference  
308 20 Operational Taxonomic Unit (OTU) picking by clustering using UCLUST at 97% sequence  
309 21 similarity, and we assigned taxonomy using the SILVA 123 (43) database. We removed samples  
310 22 with less than 1000 reads (n=15) from the OTU table and collapsed genera present with a mean  
311 23 relative abundance of less than  $2 \times 10^{-4}$  into a category labelled "Other." (43-46)

### 317 24 **3.4 Statistical Analysis**

318  
319 25 We compared differences in oral microbiome characteristics by seven sociodemographic  
320 26 factors (race/ethnicity, age, group, sex, educational attainment, income tertiles, marital status,  
321 27 nativity) and by several behavioral/oral health measures: diet (sugar sweetened beverages,  
322 28 meat, poultry, fish, vegetables, and fruits, recorded as times consumed in the past week); oral  
323 29 health behaviors (mouthwash use, flossing, time since last dental visit) and smoking status  
324 30 (categories defined above). We assessed pairwise correlation between sociodemographic  
325 31 variables using Cramer's V, a correlation coefficient for nominal variables.

328  
329 32 To assess differential abundance by sociodemographic variables, we used edgeR (47) to  
330 33 estimate a series of log-linear generalized linear models (GLMs) predicting each OTU  
331 34 abundance. OTUs were considered differentially abundant at false discovery rate (FDR) < 0.01.

337  
338  
339 1 Before edgeR, we filtered out OTUs that did not have three or more samples with a count of at  
340 2 least eight, leaving 216 OTUs for analysis, a filter representing an approximate inflection point  
341 3 on the curve of remaining OTUs against the minimum count. To examine potential mediators,  
342 4 we fit crude models as well as models adjusted for oral health behaviors, diet, smoking status,  
343 5 and age and sex (when applicable). edgeR was conducted at the taxonomic level of highest  
344 6 specificity allowed, which was the genus in all cases where FDR was less than 1%; therefore  
345 7 differential abundance findings are presented at the genus level.

349 8 We measured alpha diversity using Chao1 richness (48), which we compared by each  
350 9 sociodemographic variable using Kruskal-Wallis tests. Beta diversity was assessed using  
351 10 principal coordinates analysis and permutation multivariate analysis of variance (PERMANOVA)  
352 11 (49) on weighted UniFrac distances (50). To ensure results were not driven by selection on  
353 12 smoking status, we also compared alpha and beta diversity adjusting for smoking status.

356 13 We performed clustering of samples with respect to OTUs using partitioning around medoids  
357 14 on Bray Curtis, Jenson-Shannon, root-Jenson Shannon, weighted and unweighted UniFrac  
358 15 distances (51). Prediction strength (PS) was calculated for k=2:10 clusters on each distance  
359 16 measure, using  $PS \geq 0.9$  to signify strong support for k clusters (51).

362 17 Statistical analyses were conducted in R version 3.4 (52) for Linux.

## 365 18 **4 Results**

### 369 20 **4.1 Descriptive Statistics**

371 21 The initial subsample included 297 participants; after removing samples with less than 1000  
372 22 reads, there were 282 participants remaining for analysis. Table 1 shows descriptive statistics  
373 23 for sociodemographic characteristics including age (median [range]: 42 [20 to 94]), sex (53.2%  
374 24 female), race/ethnicity (34.4% non-Hispanic White, 26.6% non-Hispanic Black, 25.2% Hispanic),  
375 25 annual family income (42.7% less than \$30K, 33.3% \$60k or more), and educational  
376 26 achievement (23.0% less than high school diploma, 30.9% college degree or greater). Cramer's  
377 27 V on all pairwise combinations of sociodemographic variables showed only minor collinearity  
378 28 (all  $V < .35$ ) (Figure A1), indicating associations with the microbiome for each sociodemographic  
379 29 variable do not merely reflect correlations between sociodemographic variables.

### 384 30 **4.2 Relative Abundance and Alpha Diversity**

386 31 Oral microbiomes were characterized at the phylum level by a gradient between Firmicutes and  
387 32 Bacteroides abundance, with overall dominance by Firmicutes (mean=52±10%). Streptococcus

393  
394  
395 1 was the most abundant genus (36±10%) followed by Prevotella (17±8%). (Figure 1). The overall  
396 2 mean Chao1 was 462±118, with no differences by age group (p=0.79), sex (p=0.13), educational  
397 3 achievement (p=0.92), annual family income (p=0.62), marital status (p=0.54), race/ethnicity  
398 4 (p=0.13), or nativity (p=0.97) (Figure A2). These results were not changed by adjustment for  
399 5 smoking.

### 403 6 **4.3 Differential Abundance**

405 7 Numerous taxa were differentially abundant by race/ethnicity, nativity, marital status, gender,  
406 8 family income, education, and age. Figure 2 displays log-base-2 fold change (logFC), or  
407 9 coefficient from edgeR log linear models, for each comparison group and all significant OTUs.  
408 10 The logFC can be interpreted as the log-base-2 ratio of relative abundance compared to the  
409 11 reference group, so that e.g. *Lactobacillus* is found to be  $2^{2.5} = 5.7$  times as abundant among  
410 12 participants with family incomes of \$30-60,000 per year, compared to \$60,000 or more. A total  
411 13 of 69 OTUs were differentially abundant by any sociodemographic variable, including 56 by age  
412 14 group, 27 by race/ethnicity, 21 by family income, 19 by education, 19 by marital status, seven  
413 15 by nativity, and three by sex. We also found 12 unique OTUs differentially abundant by oral  
414 16 health behaviors, 49 by smoking status, and 23 by diet variables. The most frequently  
415 17 differentially abundant were *Lactobacillus* (all variables), and *Prevotella* (age, education, family  
416 18 income, marital status, race/ethnicity, nativity, Figure 2). Differential abundance findings for  
417 19 selected taxa are presented in Table 2 (see table A1 for all differential abundance findings).

422 20 Figure 3 displays the boxplots of absolute values of logFCs for both crude and adjusted models.  
423 21 The OTUs selected for display in all models are the OTUs meeting FDR <0.01 in crude models.  
424 22 Comparing adjusted vs. crude boxplots allows a visual assessment of the effect of adjustment  
425 23 on the entire set of OTUs: a shift towards zero reflects attenuation while a shift away from zero  
426 24 reflects amplification. Over all sociodemographic variables, a minor attenuating effect was  
427 25 observed after adjusting for smoking (mean change in logFC, -3.9%), oral health behaviors (-  
428 26 4.9%), diet (-6.3%), age and sex (-3.3%). Adjustment for oral health had the largest impact on  
429 27 logFCs for age group (-4%), sex (-27.4%), and nativity (-13.5%); diet had the strongest impact on  
430 28 logFCs for education (-13.1%) and marital status (-16.9%), smoking had the strongest impact on  
431 29 logFCs for family income (-11.9%), and age and sex had the strongest impact on logFCs for  
432 30 race/ethnicity (-4.2%).

### 438 31 **4.4 Beta Diversity and Clustering**

440 32 Figure 4 illustrates between-versus within-group weighted UniFrac distances by each sociodemographic  
441 33 variable. We observed overall shifts in composition by age group (p=0.017,  $r^2=0.026$ ), with no other  
442 34 variables showing greater between- than within-group variation, a result which was not changed by  
443 35 adjusting for smoking. Plots of the first two principal coordinates based on weighted UniFrac distances



1 showed little patterning by any variable (not shown). Clustering scores were sensitive to the distance  
2 metric used, with Bray-Curtis indicating moderate support for 2 clusters (PS=0.86), and all other  
3 measures providing little support for clustering.

## 4 5 Discussion

5 In a diverse population-based sample, we found that a large number of bacterial taxa in the oral  
6 microbiome were differentially abundant by age, race/ethnicity, family income, education,  
7 nativity, and sex. Notably, we found a greater number of associations with SES variables (21 by  
8 family income, 19 by education) than with sex, marital status or nativity. There were also more  
9 associations with SES than oral health behaviors (12). Sociodemographic associations were not  
10 appreciably diminished by adjustment for smoking, oral health behaviors, or dietary behaviors.  
11 Alpha diversity was similar across groups, and beta diversity explained only a small proportion  
12 of variance by age (2.7%), and less by other variables.

13 Many genera found differentially abundant by multiple variables represent taxa that have  
14 documented associations with health and disease. *Streptococcus*, *Lactobacillus* (53), *Prevotella*  
15 (54) *Fusobacterium* (55), and *Porphyromonas* (56, 57) are understood to play a role in oral  
16 disease. Further, many of these organisms likely play a role in wide ranging systemic conditions  
17 (15). Specifically, *Fusobacterium spp.* have been linked to colorectal cancer (58, 59), adverse  
18 pregnancy outcomes, CVD and rheumatoid arthritis (60). *Porphyromonas gingivalis* is a key  
19 determinant of oral microbiome structure (61), and is hypothesized to mediate an array of  
20 systemic pathogenic processes (15), including associations with stroke (11), CHD (12), a number  
21 of cancers (17, 18, 62) and rheumatoid arthritis (22).

22 To our knowledge, our study is the first to examine differences in the oral microbiome by  
23 individual level sociodemographic factors in a population-based sample. Our finding of  
24 differentially abundant taxa by race/ethnicity is consistent with previous studies with small  
25 volunteer samples. The HMP Consortium found that, for all body sites, ethnicity was the host  
26 phenotypic variable with the most associations (35). For the oral microbiome, a study  
27 examining 40 periodontal disease-related taxa found differences among Asian, Hispanic, and  
28 blacks (38). Two lower-throughput studies found greater *Prevotella* and *Porphyromonas*  
29 prevalence (40), and lower *Fusobacterium* abundance (39) in blacks vs. whites. Our finding of  
30 differential OTUs by SES variables is also consistent with findings from the Danish Health  
31 Examination Survey (DANHES, n=292), which found nine differentially abundant taxa by  
32 municipal-level SES (41).

33 Adjustment for smoking, diet, and oral health behaviors each exerted a moderate attenuating  
34 effect on differential abundance findings across sociodemographic categories. This stands to  
35 reason in light of findings by our group [CITATION PENDING – Beghini 2018 Companion Paper]

505  
506  
507 1 and others (29) that smoking is associated with major shifts in the oral microbiome, along with  
508 2 similar findings for diet (63), and indicates that some portion of observed sociodemographic  
509 3 patterning reflects differences in health habits or access to dental care. However, the finding  
510 4 that differential abundance was not eliminated by adjustments suggests that additional  
511 5 mechanism underlie sociodemographic variation in the oral microbiome. These may include  
512 6 upstream social factors such as psychosocial stress (27) or features of the built environment  
513 7 (32).

514 8 While existing oral microbiome studies are limited, the absence of differences in alpha and beta  
515 9 diversity by race/ethnicity contrasts with two previous studies among non-population-based  
516 10 samples. These found differences in alpha diversity and ethnicity-based clustering in oral  
517 11 microbiomes in non-Hispanic Blacks vs. Whites (36), and in Cheyenne and Arahapo vs. non-  
518 12 native individuals (37). Differences in alpha and beta diversity can indicate larger-scale shifts in  
519 13 composition; our finding that specific OTUs were differentially abundant but that overall shifts  
520 14 were less present may indicate that, at a population level, sociodemographic patterns in oral  
521 15 microbiome composition are more subtle.

## 522 16 **5.1 Limitations**

523 17 Despite the strength of NYC-HANES as a diverse population-based sample, the cross-sectional  
524 18 design limits its ability to test the oral microbiome as a mediator in health disparities, as  
525 19 changes in the oral microbiome may reflect existing disease rather than etiological factors.  
526 20 Additionally, our findings are limited by having primarily genus-level information, and in many  
527 21 cases salient differences exist at a greater degree of taxonomic specificity – for example, with *P.*  
528 22 *gingivalis*, *F. nucleatum*, and *Prevotella intermedia*. There may also be wide variability in  
529 23 virulence even at the species level, as is the case with *P. gingivalis* (64). Given the importance of  
530 24 many of the differentially abundant genera in health and disease, our findings suggest that  
531 25 further investigation into the role of the oral microbiome in health disparities is warranted.  
532 26 Future investigations should consider use of whole genome shotgun sequencing or other  
533 27 methods able to provide more specific taxonomic classification and describe functional, as well  
534 28 as taxonomic, composition.

## 535 29 **5.2 Conclusion**

536 30 Our results lend support to potential role of the social environment in shaping microbiome  
537 31 composition at the population level (24, 65). The finding of differentially abundant OTUs, many  
538 32 of which are health-relevant, for every sociodemographic variable, suggests that these  
539 33 associations may be important in determining population health patterns. In particular for race  
540 34 and SES, but also for nativity and marital status, the finding that multiple health-relevant  
541 35 microbes are differentially abundant supports a growing hypothesis that the microbiota may

561  
562  
563 1 partially mediate long-observed social disparities in major disease outcomes. At a minimum,  
564 2 these results highlight that social factors may be important potential confounders in studies of  
565 3 the human oral microbiome and health.  
566  
567  
568 4 Mechanisms for the observed associations are currently unknown, and one important next step  
569 5 will be to examine the multiple levels of exposures underlying these associations, including  
570 6 macro-level social and health policy, exposure to psychosocial stressors, outdoor and built  
571 7 environment features, and social interactions (24). Importantly, if the microbiome is a partial  
572 8 mediator of health disparities, then identifying modifiable features of the social environment  
573 9 that are most strongly associated with the microbiome can inform effective interventions to  
574 10 improve population health and reduce health disparities.  
575  
576  
577  
578 11  
579  
580 12  
581  
582  
583  
584  
585  
586  
587  
588  
589  
590  
591  
592  
593  
594  
595  
596  
597  
598  
599  
600  
601  
602  
603  
604  
605  
606  
607  
608  
609  
610  
611  
612  
613  
614  
615  
616

## 6 Figure Captions

Figure 1. Genus- and phylum-level relative abundances. Data are percent of overall communities within samples, summarized as mean  $\pm$  standard deviation of percent across samples. Data are from the oral microbiome subsample (n=282) of the New York City Health and Nutrition Examination Survey, 2013-2014.

Figure 2. Differential abundance by sociodemographic characteristics. OTUs meeting unadjusted FDR < 0.01 in negative binomial log-linear GLMs using edgeR. Data are from the oral microbiome subsample (n=282) of the New York City Health and Nutrition Examination Survey, 2013-2014. Filled tiles in (A) indicate the genus had at least one OTU differentially abundant by at least one coefficient contrast within the sociodemographic factor. Where more than one OTU was significant within one genus, the maximum logFC is displayed in (A). Reference groups for sociodemographic variables are as follows: Sex: Male, Age: 20-34, Education: College Graduate or More, Family income: \$60,000 or more, Marital status: Married, Race/ethnicity: Non-Hispanic White, US- vs. foreign-born: US-Born, 50 States, DC, PR and Territories. Abbreviations: cat=categories; GLM=generalized linear model; logFC=log fold change; OTU=operational taxonomic unit; US=United States.

Figure 3. Distribution of absolute values of log-fold change (logFC) in crude and adjusted negative binomial log-linear GLMs edgeR models for each sociodemographic variable. Data are from the oral microbiome subsample (n=282) of the New York City Health and Nutrition Examination Survey, 2013-2014. Abbreviations: GLM=generalized linear model; logFC=log fold change; US=United States.

Figure 4. Within and between group beta diversity estimate distributions. Data are from the oral microbiome subsample (n=282) of the New York City Health and Nutrition Examination Survey, 2013-2014. Abbreviations: cat=category.

Figure A1. Examining collinearity among sociodemographic variables. Data are absolute value of pairwise Cramer's V correlation coefficient between sociodemographic factor levels. Data are from the full sample (n=1,527) of the New York City Health and Nutrition Examination Survey, 2013-2014. Abbreviations: cat=categories; US=United States.

Figure A2. Alpha diversity by Sociodemographic Characteristics. Chao1 alpha diversity of 16S rRNA oral microbiome samples. Measures were compared using a null hypothesis of no difference between groups (Kruskal-Wallis test,  $p > 0.1$  for all tests). Data are from the oral microbiome subsample (n=282) of the New York City Health and Nutrition Examination Survey, 2013-2014. Abbreviations: GED=General equivalency diploma; PR=Puerto Rico; US=United States.

## 1 7 Tables

### 2 Table 1. Demographics

|                                    | Oral Microbiome Subsample | Full NYC HANES Sample |
|------------------------------------|---------------------------|-----------------------|
| Total                              | 282                       | 1527                  |
| Age in years - median [range]      | 42 [20 to 94]             | 42 [20 to 97]         |
| Age group (%)                      |                           |                       |
| 20-29                              | 70 (24.8)                 | 360 (23.6)            |
| 30-39                              | 60 (21.3)                 | 337 (22.1)            |
| 40-49                              | 51 (18.1)                 | 252 (16.5)            |
| 50-59                              | 51 (18.1)                 | 264 (17.3)            |
| 60 and over                        | 50 (17.7)                 | 314 (20.6)            |
| Sex = Female (%)                   | 150 (53.2)                | 885 (58.0)            |
| Educational achievement (%)        |                           |                       |
| College graduate or more           | 87 (30.9)                 | 628 (41.1)            |
| Less than High school diploma      | 65 (23.0)                 | 316 (20.7)            |
| High school graduate/GED           | 63 (22.3)                 | 244 (16.0)            |
| Some College or associate's degree | 67 (23.8)                 | 337 (22.1)            |
| Missing                            | 0 ( 0.0)                  | 2 ( 0.1)              |
| Annual family income (%)           |                           |                       |
| \$60,000 or more                   | 82 (29.1)                 | 429 (28.1)            |
| Less Than \$30,000                 | 105 (37.2)                | 537 (35.2)            |
| \$30,000 - \$60,000                | 59 (20.9)                 | 348 (22.8)            |
| Missing                            | 36 (12.8)                 | 213 (13.9)            |
| Marital Status (%)                 |                           |                       |
| Married                            | 96 (34.0)                 | 590 (38.6)            |
| Widowed                            | 15 ( 5.3)                 | 76 ( 5.0)             |
| Divorced                           | 23 ( 8.2)                 | 156 (10.2)            |
| Separated                          | 12 ( 4.3)                 | 51 ( 3.3)             |
| Never married                      | 101 (35.8)                | 511 (33.5)            |
| Living with partner                | 35 (12.4)                 | 143 ( 9.4)            |
| Race/ethnicity (%)                 |                           |                       |

729  
730  
731  
732  
733  
734  
735  
736  
737  
738  
739  
740  
741  
742  
743  
744  
745  
746  
747  
748  
749  
750  
751  
752  
753  
754  
755  
756  
757  
758  
759  
760  
761  
762  
763  
764  
765  
766  
767  
768  
769  
770  
771  
772  
773  
774  
775  
776  
777  
778  
779  
780  
781  
782  
783  
784

|                                          | Oral Microbiome Subsample | Full NYC HANES Sample |
|------------------------------------------|---------------------------|-----------------------|
| Non-Hispanic White                       | 97 (34.4)                 | 513 (33.6)            |
| Non-Hispanic Black                       | 75 (26.6)                 | 340 (22.3)            |
| Hispanic                                 | 71 (25.2)                 | 390 (25.5)            |
| Asian                                    | 22 ( 7.8)                 | 204 (13.4)            |
| Other                                    | 17 ( 6.0)                 | 80 ( 5.2)             |
| Place of birth (%)                       |                           |                       |
| US, PR and Territories                   | 90 (31.9)                 | 668 (43.7)            |
| Other                                    | 190 (67.4)                | 851 (55.7)            |
| <i>Missing</i>                           | 2 ( 0.7)                  | 8 ( 0.5)              |
| Gum disease (self-reported) (%)          |                           |                       |
| Yes                                      | 27 ( 9.6)                 | 175 (11.5)            |
| No                                       | 254 (90.1)                | 1322 (86.6)           |
| <i>Missing</i>                           | 1 ( 0.4)                  | 30 ( 2.0)             |
| Mouthwash use (times per week) (%)       |                           |                       |
| None                                     | 115 (40.8)                | 591 (38.7)            |
| 1 to 5                                   | 68 (24.1)                 | 370 (24.2)            |
| 6 to 7                                   | 99 (35.1)                 | 565 (37.0)            |
| <i>Missing</i>                           | 0 ( 0.0)                  | 1 ( 0.1)              |
| Sugar-sweetened beverages (per week) (%) |                           |                       |
| 0-<1                                     | 152 (53.9)                | 985 (64.5)            |
| 1-5                                      | 67 (23.8)                 | 313 (20.5)            |
| 6 or more                                | 62 (22.0)                 | 227 (14.9)            |
| <i>Missing</i>                           | 1 ( 0.4)                  | 2 ( 0.1)              |
| Smoking status (%)                       |                           |                       |
| Cigarette                                | 86 (30.5)                 | 215 (14.1)            |
| Never smoker                             | 43 (15.2)                 | 843 (55.2)            |
| Former smoker                            | 43 (15.2)                 | 285 (18.7)            |
| Alternative smoker                       | 72 (25.5)                 | 142 ( 9.3)            |
| Secondhand                               | 38 (13.5)                 | 42 ( 2.8)             |

Table 2. Differential abundance findings for OTUs selected based on clinical relevance, where FDR < 0.01. Data are from the oral microbiome subsample (n=282) of the New York City Health and Nutrition Examination Survey, 2013-2014.

|                                    | <b>Lactobacillus</b> |            | <b>Prevotella</b> |            | <b>Streptococcus</b> |            | <b>Porphyromonas</b> |            | <b>Fusobacterium</b> |            | <b>Lactococcus</b> |            |
|------------------------------------|----------------------|------------|-------------------|------------|----------------------|------------|----------------------|------------|----------------------|------------|--------------------|------------|
|                                    | <b>logFC</b>         | <b>FDR</b> | <b>logFC</b>      | <b>FDR</b> | <b>logFC</b>         | <b>FDR</b> | <b>logFC</b>         | <b>FDR</b> | <b>logFC</b>         | <b>FDR</b> | <b>logFC</b>       | <b>FDR</b> |
| <b>Race/ethnicity</b>              |                      |            |                   |            |                      |            |                      |            |                      |            |                    |            |
| Non-Hispanic White                 | 0                    | <i>Ref</i> | 0                 | <i>Ref</i> | 0                    | <i>Ref</i> | 0                    | <i>Ref</i> | 0                    | <i>Ref</i> | 0                  | <i>Ref</i> |
| Non-Hispanic Black                 | 2.1                  | <0.0001    | 1.9               | <0.0001    | -                    | -          | 0.9                  | 0.0018     | -                    | -          | 2.9                | <0.0001    |
| Hispanic                           | -                    | -          | 1.8               | <0.0001    | -                    | -          | 1.8                  | <0.0001    | -                    | -          | -                  | -          |
| <b>Family income</b>               |                      |            |                   |            |                      |            |                      |            |                      |            |                    |            |
| \$60,000 or more                   | 0                    | <i>Ref</i> | 0                 | <i>Ref</i> | 0                    | <i>Ref</i> | 0                    | <i>Ref</i> | 0                    | <i>Ref</i> | 0                  | <i>Ref</i> |
| \$30,000 - \$60,000                | 2.5                  | <0.0001    | -                 | -          | 0.9                  | 0.003      | -                    | -          | -                    | -          | -                  | -          |
| Less Than \$30,000                 | -                    | -          | 1.6               | 0.0025     | -                    | -          | 1.6                  | <0.0001    | 1.5                  | 0.003      | -                  | -          |
| <b>Education</b>                   |                      |            |                   |            |                      |            |                      |            |                      |            |                    |            |
| College Graduate or More           | 0                    | <i>Ref</i> | 0                 | <i>Ref</i> | 0                    | <i>Ref</i> | 0                    | <i>Ref</i> | 0                    | <i>Ref</i> | 0                  | <i>Ref</i> |
| Some College or Associate's Degree | 2.7                  | <0.0001    | -                 | -          | -                    | -          | -                    | -          | -                    | -          | 3.0                | <0.0001    |
| High School Diploma or Less        | -                    | -          | 1.4               | 0.0064     | -                    | -          | 1.2                  | 0.0008     | 1.4                  | 0.006      | -                  | -          |

Abbreviations: logFC, log fold change; FDR, false discovery rate; Ref, reference group. "-" indicates genus was not significantly differentially abundant.

827  
828  
829  
830  
831  
832  
833  
834  
835  
836  
837  
838  
839  
840  
841  
842  
843  
844  
845  
846  
847  
848  
849  
850  
851  
852  
853  
854  
855  
856  
857  
858  
859  
860  
861  
862  
863  
864  
865  
866  
867  
868  
869  
870  
871  
872  
873  
874  
875  
876  
877  
878  
879  
880  
881  
882

## 8 Acknowledgements

The individual author contributions are as follows: HEJ, LW, LT, RB, and JD conceptualized and designed the study; AR, FB, NS, and LW led data analysis and data visualization; RB, CPZ, MU, and TUM led specimen processing and 16S data generation; AR wrote first draft of manuscript; and all authors contributed to editing/revisions on manuscript. We gratefully acknowledge the efforts of the New York City Department of Health and Mental Hygiene in co-leading the parent NYC HANES study. In particular, we wish to thank Sharon Perlman, Carolyn Greene, Claudia Chernov, Amado Punsalang, and the many other staff who helped support data collection.

## 9 Funding

This study was supported by internal funds at the CUNY School of Public Health and Albert Einstein College of Medicine with salary support (JBD, AR, LW) from National Institute of Allergy and Infectious Diseases (1R21AI121784-01).

## 10 References

1. Huang DL, Park M. Socioeconomic and racial/ethnic oral health disparities among US older adults: oral health quality of life and dentition. *J Public Health Dent* 2015;75(2):85-92.
2. Karlamangla AS, Merkin SS, Crimmins EM, et al. Socioeconomic and ethnic disparities in cardiovascular risk in the United States, 2001-2006. *Ann Epidemiol* 2010;20(8):617-28.
3. Benjamin EJ, Blaha MJ, Chiuve SE, et al. Heart Disease and Stroke Statistics—2017 Update: A Report From the American Heart Association. *Circulation* 2017:CIR.0000000000000485.
4. Beckles GL, Chou C-F. Disparities in the Prevalence of Diagnosed Diabetes - United States, 1999-2002 and 2011-2014. *MMWR Morb Mortal Wkly Rep* 2016;65(45):1265-9.
5. Crawford S, Joshi N, Boulet SL, et al. Maternal Racial and Ethnic Disparities in Neonatal Birth Outcomes With and Without Assisted Reproduction. *Obstet Gynecol* 2017;129(6):1022-30.
6. Martinson ML, Reichman NE. Socioeconomic Inequalities in Low Birth Weight in the United States, the United Kingdom, Canada, and Australia. *Am J Public Health* 2016;106(4):748-54.
7. McBurney CA, Vina ER. Racial and ethnic disparities in rheumatoid arthritis. *Curr Rheumatol Rep* 2012;14(5):463-71.
8. Curtis MA, Zenobia C, Darveau RP. The relationship of the oral microbiota to periodontal health and disease. *Cell Host Microbe* 2011;10(4):302-6.
9. Darveau RP. Periodontitis: a polymicrobial disruption of host homeostasis. *Nat Rev Microbiol* 2010;8(7):481-90.
10. Lockhart PB, Bolger AF, Papapanou PN, et al. Periodontal disease and atherosclerotic vascular disease: does the evidence support an independent association?: a scientific statement from the American Heart Association. *Circulation* 2012;125(20):2520-44.
11. Pussinen PJ, Alfthan G, Jousilahti P, et al. Systemic exposure to Porphyromonas gingivalis predicts incident stroke. *Atherosclerosis* 2007;193(1):222-8.
12. Pussinen PJ, Jousilahti P, Alfthan G, et al. Antibodies to periodontal pathogens are associated with coronary heart disease. *Arterioscler Thromb Vasc Biol* 2003;23(7):1250-4.



- 883  
884  
885  
886  
887  
888  
889  
890  
891  
892  
893  
894  
895  
896  
897  
898  
899  
900  
901  
902  
903  
904  
905  
906  
907  
908  
909  
910  
911  
912  
913  
914  
915  
916  
917  
918  
919  
920  
921  
922  
923  
924  
925  
926  
927  
928  
929  
930  
931  
932  
933  
934  
935  
936  
937  
938
13. Gurav A, Jadhav V. Periodontitis and risk of diabetes mellitus. *J Diabetes* 2011;3(1):21-8.
  14. Lalla E, Papapanou PN. Diabetes mellitus and periodontitis: a tale of two common interrelated diseases. *Nat Rev Endocrinol* 2011;7(12):738-48.
  15. Atanasova KR, Yilmaz Ö. Prelude to oral microbes and chronic diseases: past, present and future. *Microbes Infect* 2015;17(7):473-83.
  16. Hooper SJ, Crean S-J, Fardy MJ, et al. A molecular analysis of the bacteria present within oral squamous cell carcinoma. *J Med Microbiol* 2007;56(Pt 12):1651-9.
  17. Fan X, Alekseyenko AV, Wu J, et al. Human oral microbiome and prospective risk for pancreatic cancer: a population-based nested case-control study. *Gut* 2016.
  18. Ahn J, Segers S, Hayes RB. Periodontal disease, Porphyromonas gingivalis serum antibody levels and orodigestive cancer mortality. *Carcinogenesis* 2012;33(5):1055-8.
  19. Buduneli N, Baylas H, Buduneli E, et al. Periodontal infections and pre-term low birth weight: a case-control study. *J Clin Periodontol* 2005;32(2):174-81.
  20. Fardini Y, Chung P, Dumm R, et al. Transmission of diverse oral bacteria to murine placenta: evidence for the oral microbiome as a potential source of intrauterine infection. *Infect Immun* 2010;78(4):1789-96.
  21. Bingham CO, 3rd, Moni M. Periodontal disease and rheumatoid arthritis: the evidence accumulates for complex pathobiologic interactions. *Curr Opin Rheumatol* 2013;25(3):345-53.
  22. Ogrendik M. Rheumatoid arthritis is an autoimmune disease caused by periodontal pathogens. *Int J Gen Med* 2013;6:383-6.
  23. Findley K, Williams DR, Grice EA, et al. Health Disparities and the Microbiome. *Trends Microbiol* 2016;24(11):847-50.
  24. Dowd JB, Renson A. "Under the Skin" and into the Gut: Social Epidemiology of the Microbiome. *Current Epidemiology Reports* 2018:1-10.
  25. Cohen JM, Wilson ML, Aiello AE. Analysis of social epidemiology research on infectious diseases: historical patterns and future opportunities. *J Epidemiol Community Health* 2007;61(12):1021-7.
  26. Aiello AE, Dowd JB. Socio-economic Status and Immunosenescence. *Immunosenescence*: Springer, New York, NY, 2013:145-57.
  27. Bosch JA, Turkenburg M, Nazmi K, et al. Stress as a determinant of saliva-mediated adherence and coadherence of oral and nonoral microorganisms. *Psychosom Med* 2003;65(4):604-12.
  28. Kato I, Vasquez A, Moyerbrailean G, et al. Nutritional Correlates of Human Oral Microbiome. *J Am Coll Nutr* 2017;36(2):88-98.
  29. Wu J, Peters BA, Dominianni C, et al. Cigarette smoking and the oral microbiome in a large study of American adults. *The ISME journal* 2016;10(10):2435-46.
  30. Corby PM, Bretz WA, Hart TC, et al. Heritability of oral microbial species in caries-active and caries-free twins. *Twin Res Hum Genet* 2007;10(6):821-8.
  31. Li Y, Ismail AI, Ge Y, et al. Similarity of bacterial populations in saliva from African-American mother-child dyads. *J Clin Microbiol* 2007;45(9):3082-5.
  32. Lax S, Smith DP, Hampton-Marcell J, et al. Longitudinal analysis of microbial interaction between humans and the indoor environment. *Science* 2014;345(6200):1048-52.
  33. Aagaard K, Petrosino J, Keitel W, et al. The Human Microbiome Project strategy for comprehensive sampling of the human microbiome and why it matters. *FASEB J* 2013;27(3):1012-22.
  34. Segata N, Haake SK, Mannon P, et al. Composition of the adult digestive tract bacterial microbiome based on seven mouth surfaces, tonsils, throat and stool samples. *Genome biology* 2012;13(6):R42.
  35. Human Microbiome Project C. Structure, function and diversity of the healthy human microbiome. *Nature* 2012;486(7402):207-14.

- 939  
940  
941 36. Mason MR, Nagaraja HN, Camerlengo T, et al. Deep sequencing identifies ethnicity-specific  
942 bacterial signatures in the oral microbiome. *PLoS one* 2013;8(10):e77287.  
943 37. Ozga AT, Sankaranarayanan K, Tito RY, et al. Oral microbiome diversity among Cheyenne and  
944 Arapaho individuals from Oklahoma. *Am J Phys Anthropol* 2016;161(2):321-7.  
945 38. Craig Rg BRYJBPKJMDFJIMSSSHAD. Prevalence and risk indicators for destructive periodontal  
946 diseases in 3 urban American minority populations.pdf. *J Clin Periodontol* 2001(28):524-35.  
947 39. Schenkein HA, Burmeister JA, Koertge TE, et al. The influence of race and gender on periodontal  
948 microflora. *J Periodontol* 1993;64(4):292-6.  
949 40. Beck JD, Koch GG, Zambon JJ, et al. Evaluation of oral bacteria as risk indicators for periodontitis  
950 in older adults. *J Periodontol* 1992;63(2):93-9.  
951 41. Belstrøm D, Holmstrup P, Nielsen CH, et al. Bacterial profiles of saliva in relation to diet, lifestyle  
952 factors, and socioeconomic status. *J Oral Microbiol* 2014;6.  
953 42. Thorpe LE, Greene C, Freeman A, et al. Rationale, design and respondent characteristics of the  
954 2013-2014 New York City Health and Nutrition Examination Survey (NYC HANES 2013-2014).  
955 *Prev Med Rep* 2015;2:580-5.  
956 43. Caporaso JG, Lauber CL, Walters WA, et al. Global patterns of 16S rRNA diversity at a depth of  
957 millions of sequences per sample. *Proceedings of the National Academy of Sciences of the*  
958 *United States of America* 2011;108 Suppl 1:4516-22.  
959 44. Wang Y, Qian PY. Conservative Fragments in Bacterial 16S rRNA Genes and Primer Design for  
960 16S Ribosomal DNA Amplicons in Metagenomic Studies. *PLoS one* 2009;4(10).  
961 45. Hamady M, Walker JJ, Harris JK, et al. Error-correcting barcoded primers allow hundreds of  
962 samples to be pyrosequenced in multiplex. *Nature methods* 2008;5(3):235-7.  
963 46. Glöckner FO, Yilmaz P, Quast C, et al. 25 years of serving the community with ribosomal RNA  
964 gene reference databases and tools. *J Biotechnol* 2017.  
965 47. Robinson MD, McCarthy DJ, Smyth GK. edgeR: a Bioconductor package for differential  
966 expression analysis of digital gene expression data. *Bioinformatics* 2010;26(1):139-40.  
967 48. Chao A. Nonparametric estimation of the number of classes in a population. *Scandinavian*  
968 *Journal of statistics* 1984:265-70.  
969 49. Anderson MJ. A new method for non-parametric multivariate analysis of variance. *Austral*  
970 *ecology* 2001;26(1):32-46.  
971 50. Lozupone C, Knight R. UniFrac: a new phylogenetic method for comparing microbial  
972 communities. *Applied and environmental microbiology* 2005;71(12):8228-35.  
973 51. Koren O, Knights D, Gonzalez A, et al. A guide to enterotypes across the human body: meta-  
974 analysis of microbial community structures in human microbiome datasets. *PLoS Comput Biol*  
975 2013;9(1):e1002863.  
976 52. Team RC. R: A language and environment for statistical computing. *R Foundation for Statistical*  
977 *Computing, Vienna, Austria* 2017.  
978 53. Takahashi N, Nyvad B. The role of bacteria in the caries process: ecological perspectives. *J Dent*  
979 *Res* 2011;90(3):294-303.  
980 54. Yang F, Zeng X, Ning K, et al. Saliva microbiomes distinguish caries-active from healthy human  
981 populations. *ISME J* 2012;6(1):1-10.  
982 55. Al-Ahmad A, Wunder A, Auschill TM, et al. The in vivo dynamics of *Streptococcus* spp.,  
983 *Actinomyces naeslundii*, *Fusobacterium nucleatum* and *Veillonella* spp. in dental plaque biofilm  
984 as analysed by five-colour multiplex fluorescence in situ hybridization. *J Med Microbiol*  
985 2007;56(Pt 5):681-7.  
986 56. Zijngje V, van Leeuwen MBM, Degener JE, et al. Oral biofilm architecture on natural teeth. *PLoS*  
987 *one* 2010;5(2):e9321.  
988 57. Gursoy UK, Könönen E, Uitto V-J, et al. Salivary interleukin-1beta concentration and the  
989  
990  
991  
992  
993  
994

- 995  
996  
997 presence of multiple pathogens in periodontitis. *J Clin Periodontol* 2009;36(11):922-7.  
998 58. Flanagan L, Schmid J, Ebert M, et al. Fusobacterium nucleatum associates with stages of  
999 colorectal neoplasia development, colorectal cancer and disease outcome. *Eur J Clin Microbiol*  
1000 *Infect Dis* 2014;33(8):1381-90.  
1001 59. Mima K, Nishihara R, Qian ZR, et al. Fusobacterium nucleatum in colorectal carcinoma tissue and  
1002 patient prognosis. *Gut* 2016;65(12):1973-80.  
1003 60. Han YW. Fusobacterium nucleatum: a commensal-turned pathogen. *Curr Opin Microbiol*  
1004 2015;23:141-7.  
1005 61. Hajishengallis G. Periodontitis: from microbial immune subversion to systemic inflammation.  
1006 *Nat Rev Immunol* 2015;15(1):30-44.  
1007 62. Atanasova KR, Yilmaz O. Looking in the Porphyromonas gingivalis cabinet of curiosities: the  
1008 microbium, the host and cancer association. *Mol Oral Microbiol* 2014;29(2):55-66.  
1009 63. Hansen TH, Kern T, Bak EG, et al. Impact of a vegan diet on the human salivary microbiota.  
1010 *Scientific reports* 2018;8(1):5847.  
1011 64. Tribble GD, Kerr JE, Wang B-Y. Genetic diversity in the oral pathogen Porphyromonas gingivalis:  
1012 molecular mechanisms and biological consequences. *Future Microbiol* 2013;8(5):607-20.  
1013 65. Herd P, Palloni A, Rey F, et al. Social and population health science approaches to understand  
1014 the human microbiome. *Nature Human Behaviour* 2018:1.  
1015  
1016  
1017  
1018  
1019  
1020  
1021  
1022  
1023  
1024  
1025  
1026  
1027  
1028  
1029  
1030  
1031  
1032  
1033  
1034  
1035  
1036  
1037  
1038  
1039  
1040  
1041  
1042  
1043  
1044  
1045  
1046  
1047  
1048  
1049  
1050

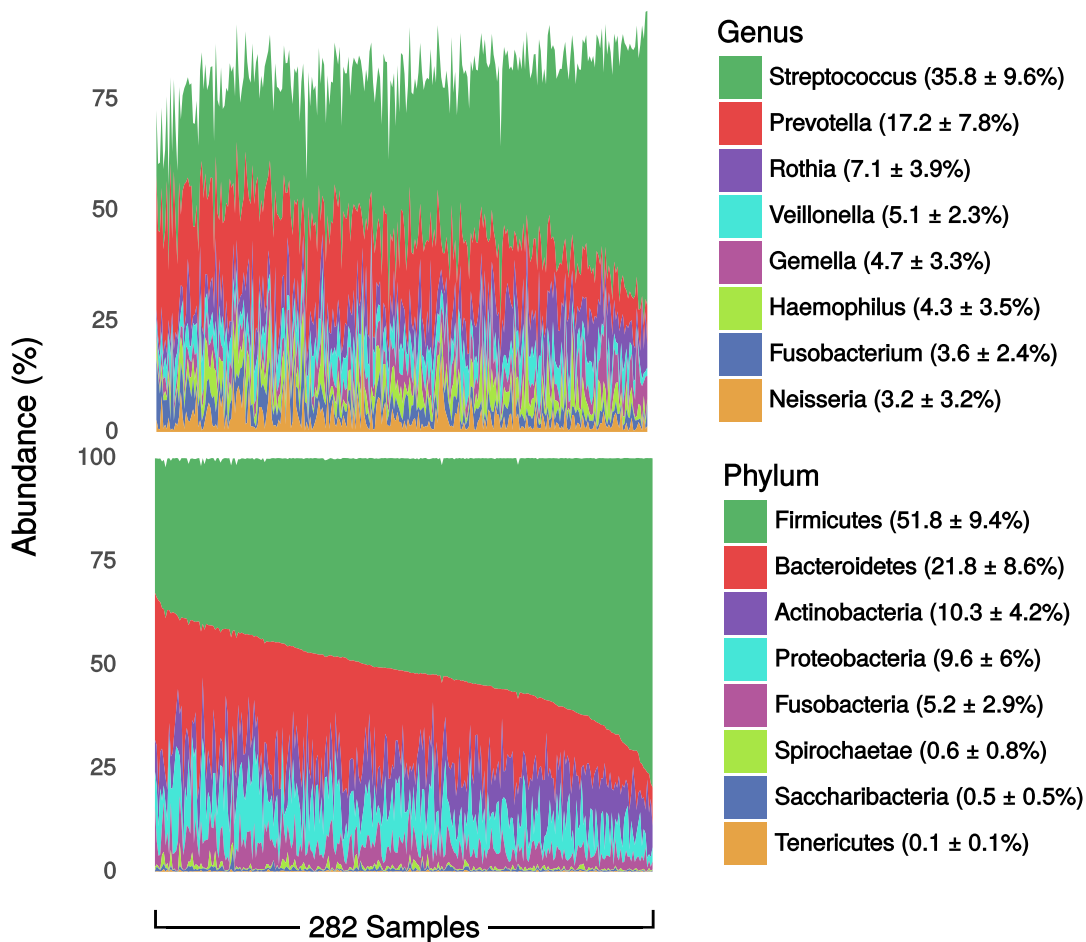

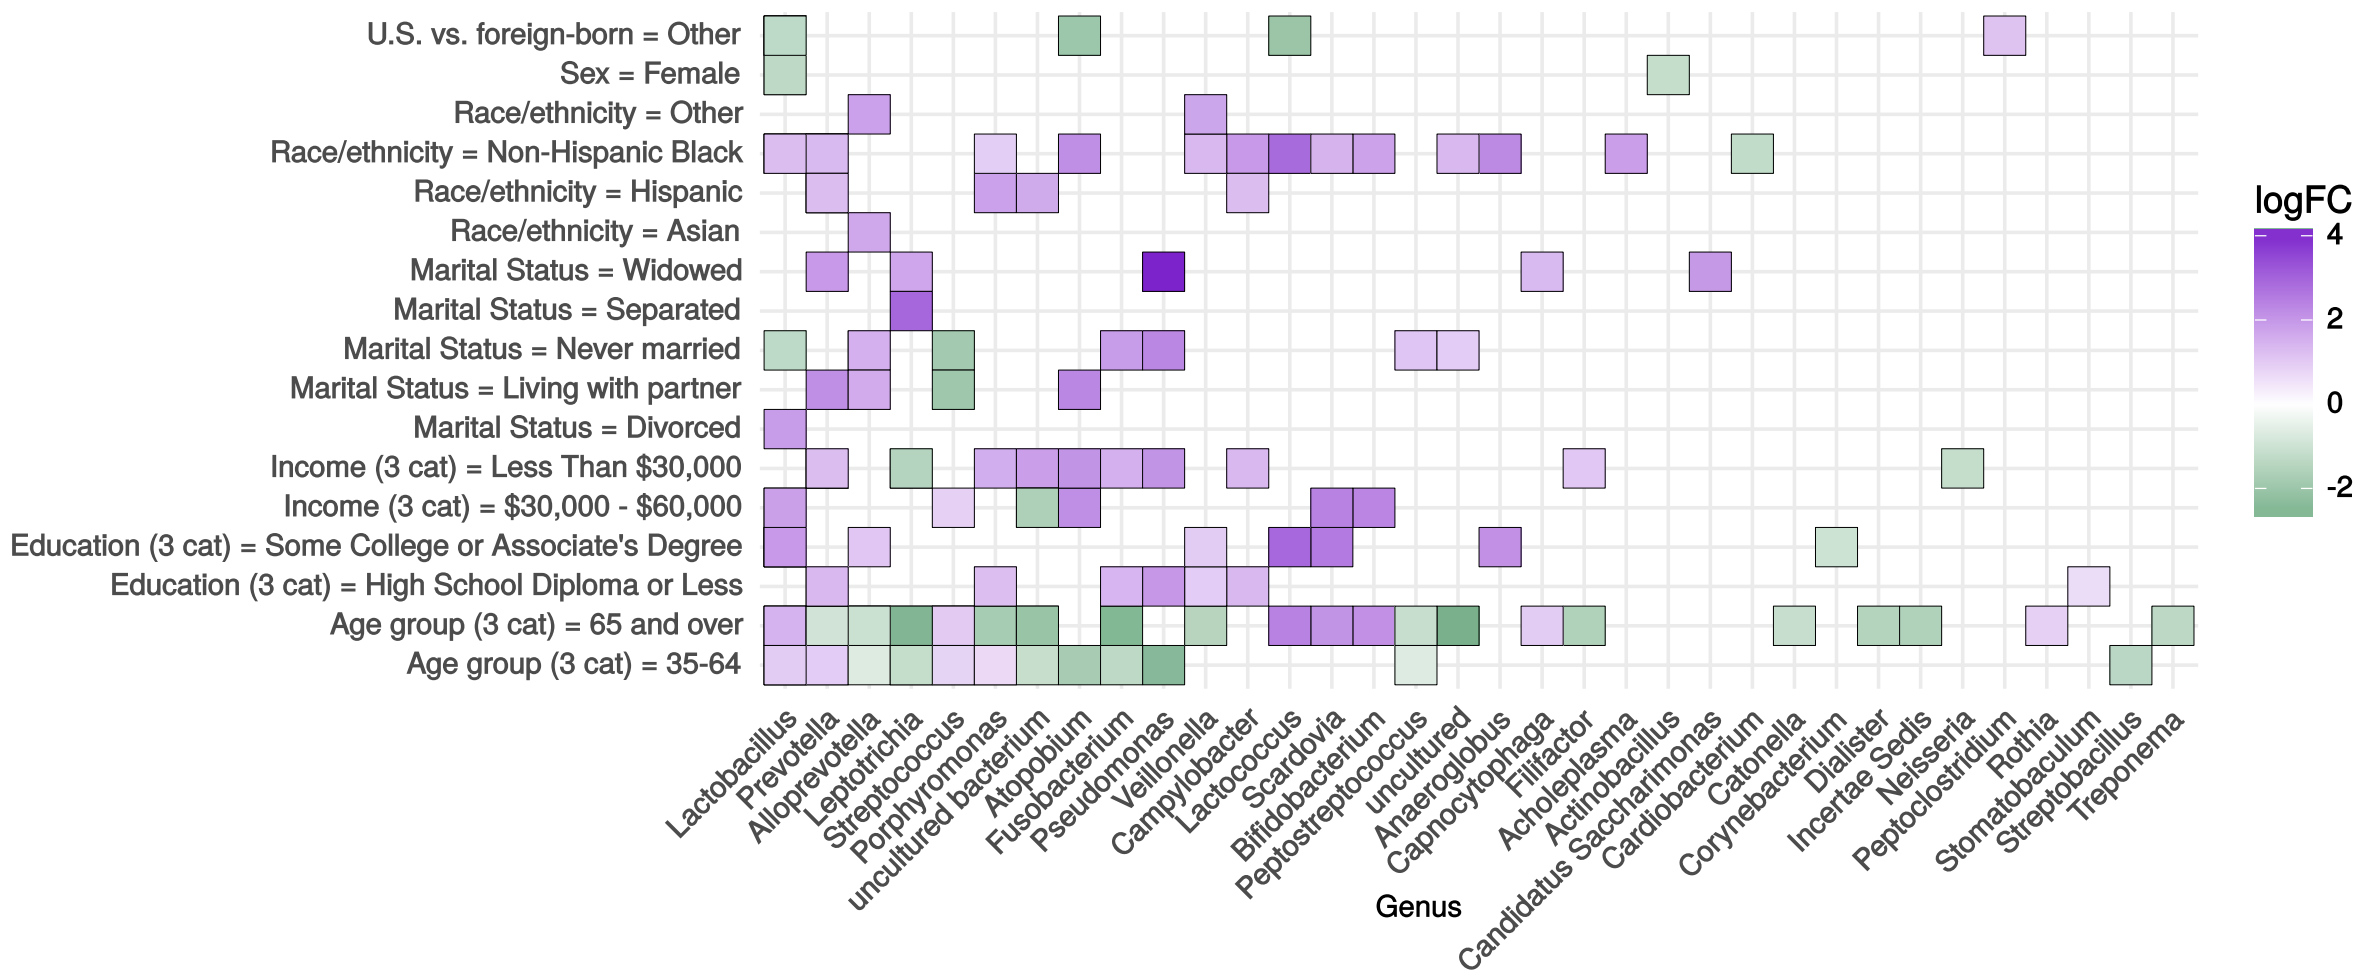

### Race/ethnicity

### Education

### Family Income

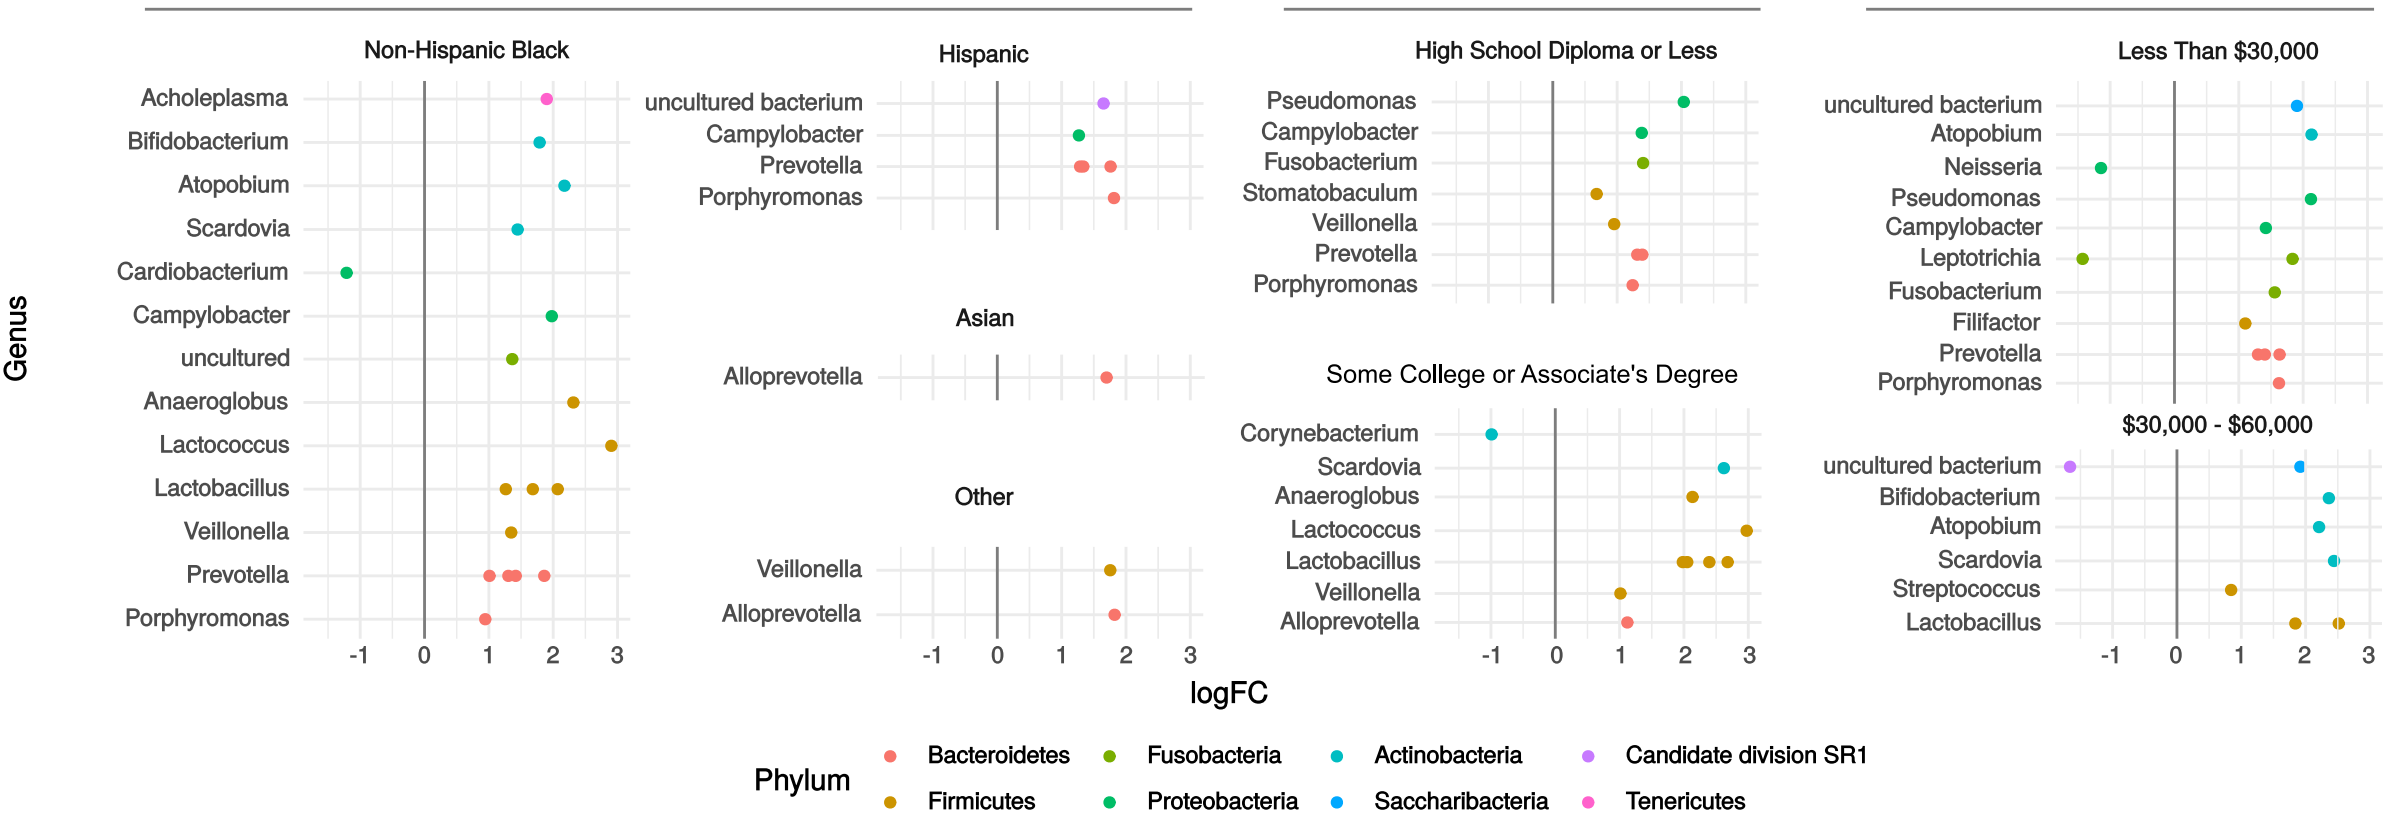

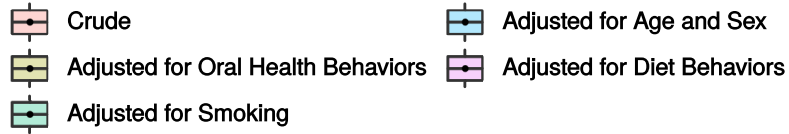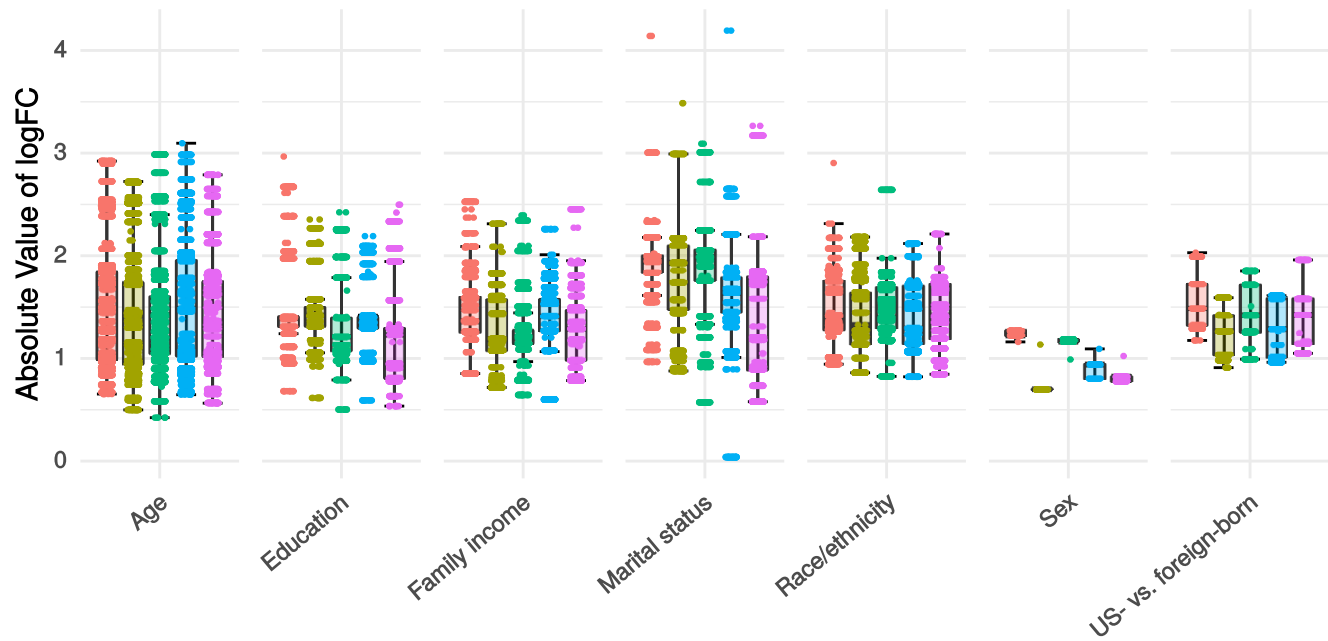

Within group    Between groups

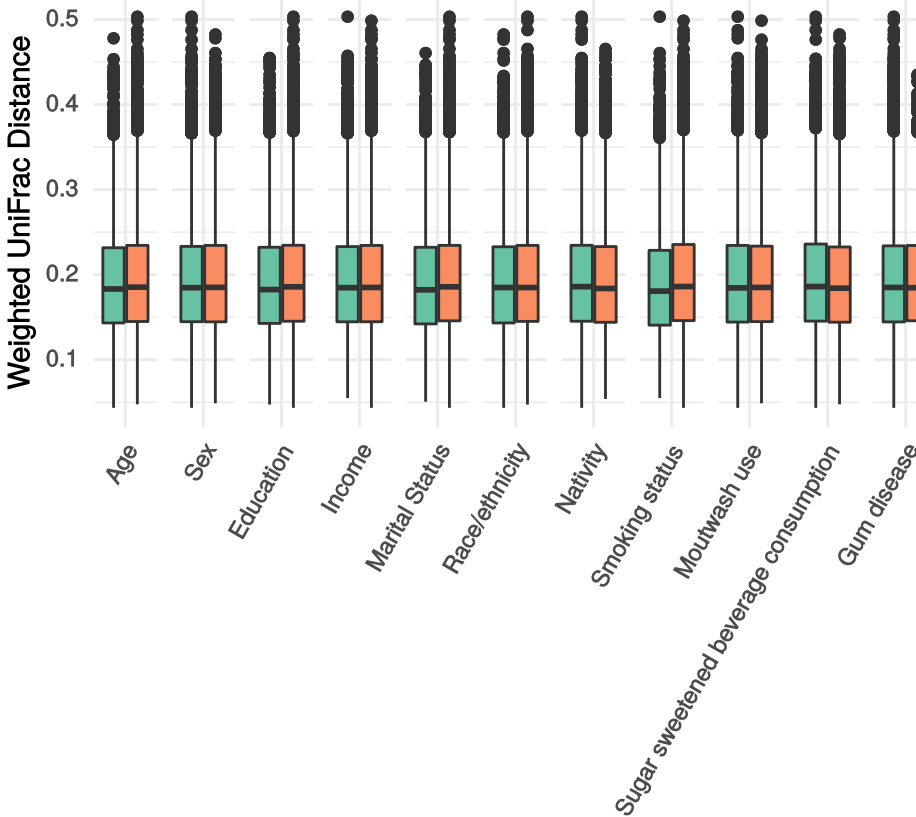





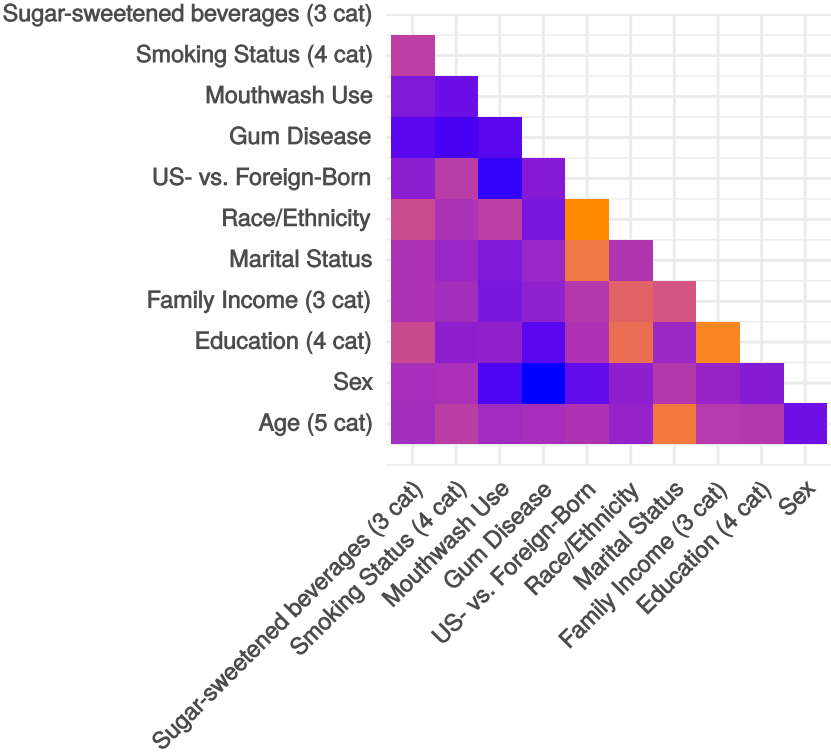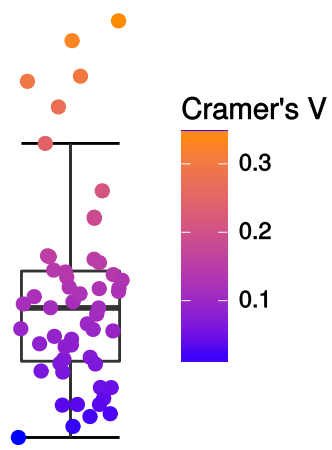

Chao1 Alpha Diversity

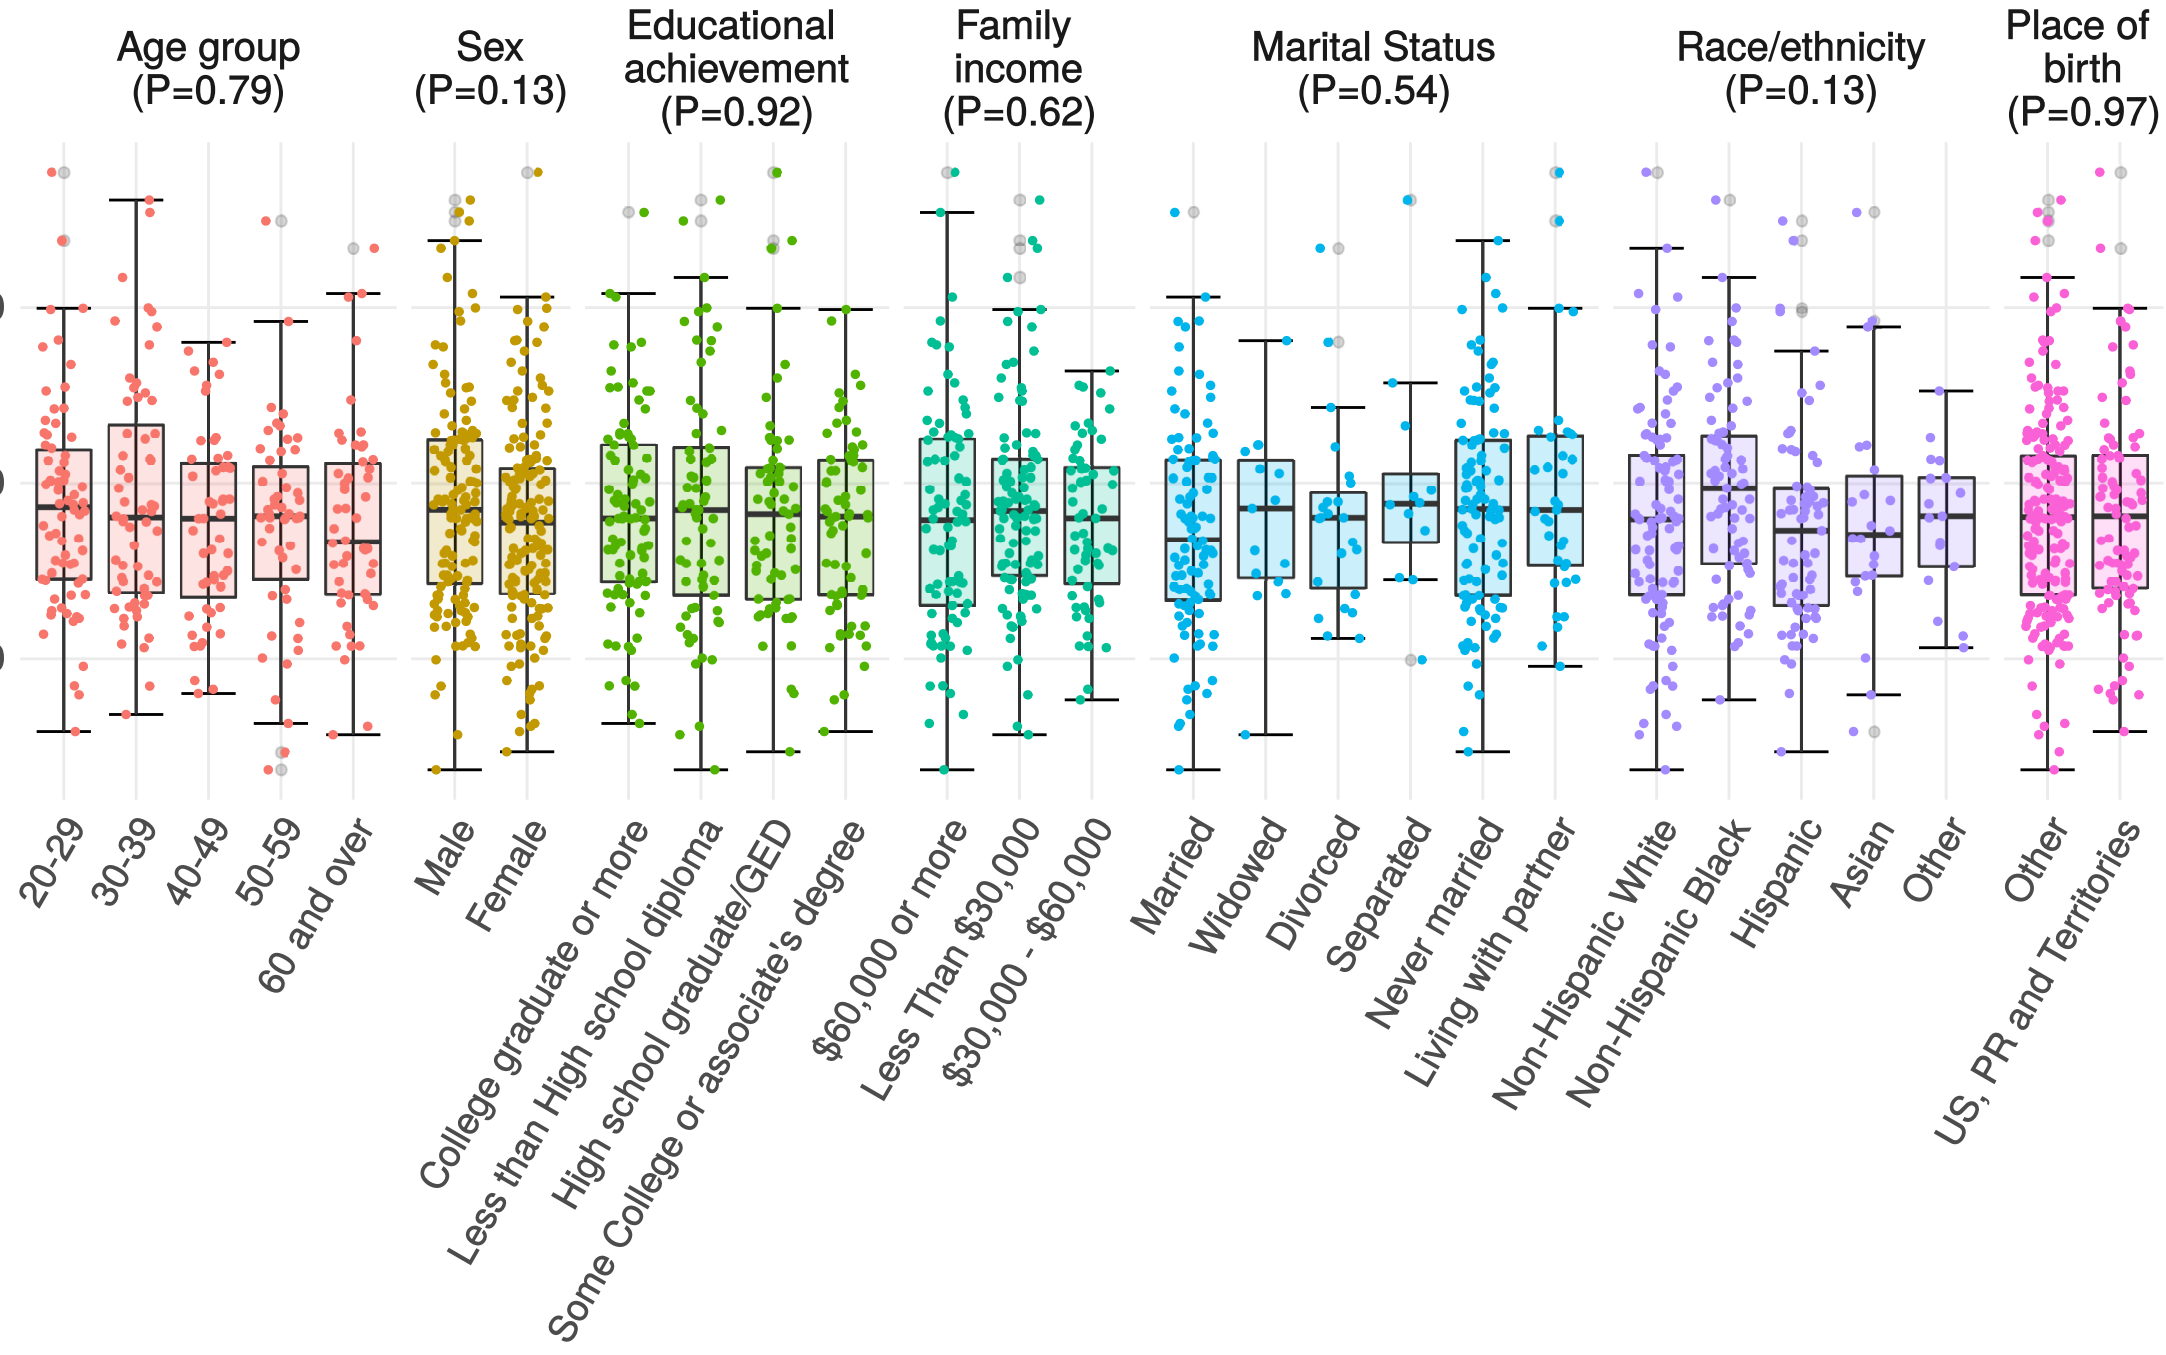

## DNA Extraction

All laboratory procedures were performed under a hood (AirClean Systems) to minimize environmental contamination and negative controls were used throughout. From each oral rinse sample, a 1.5 mL aliquot was centrifuged at 750 x g for 5 min and all but 150 µl of supernatant was removed. The pellet was re-suspended in the remaining supernatant and incubated in an enzyme mixture consisting of lysozyme (0.84 mg/ml, Sigma Aldrich), mutanolysin (0.25 U/ml, Sigma Aldrich) and lysostaphin (21.10 U/ml, Sigma Aldrich), at 37°C for 30 minutes. This was followed by incubation at 56°C for 10 minutes in 15 µl proteinase K and 150 µl Buffer AL. Samples were then transferred to screw top tubes with 100 g of 0.1-mm-diameter Zirconia/Silica Beads (BioSpec) and bead beaten using a FastPrep-24 homogenizer (MP Biomedicals) at speed 6.0 for 40 seconds. Tubes were centrifuged at 750 x g for 30 sec and 150 µl of supernatant was added to a new 1.7 ml tube with 150 µl of 100% ethanol and mixed by vortexing for 15 seconds. Supernatant was then added to the spin column from the QIAamp DNA mini kit (QIAGEN) and centrifuged at 6000 x g for 1 minute. Column purification was performed according to the QIAamp DNA mini kit directions starting at the AWI wash step. Final elution was performed in 100 µl of Buffer AE.

## 16S rRNA Gene Amplification

DNA was amplified for the V4 variable region of the 16S rRNA gene using the primers 16SV4\_515F (GTGYCAGCMGCCGCGGTA) and 16SV4\_806R (GGACTACHVGGGTWTCTAAT) (45, 46). Each primer had an 8-bp unique Hamming barcode with forward primers containing a 3-bp (TCG) and 4-bp (ACTG) pad on either side, with reverse primers including a 3-bp (GTA) and 4-bp (TC) pad on each side of the barcode (47). PCR reactions were performed with 17.75 µl of nuclease-free PCR-grade water, 2.5 µl of 10X Buffer w/ MgCl<sub>2</sub> (Affymetrix, Santa Clara, CA), 1µl of MgCl<sub>2</sub> (25 mM, Affymetrix, Santa Clara, California, USA), 0.5 µl of dNTPs (10 mM, Roche, Basel, Switzerland), 0.25 µl of AmpliTaq Gold DNA Polymerase (5 U/µl, Applied Biosystems, Foster City, California), 0.5 µl of HotStart-IT FidelityTaq (2.5 U/µl, Affymetrix, Santa Clara, CA), 1µl of each primer (5 µM), and 0.5 µl of DNA extraction template. Thermal cycling conditions consisted of initial denaturation of 95°C for 5 min, followed by 15 cycles of 95°C for 1 min, 55°C for 1 min, and 68°C for 1 min, followed by 15 cycles of 95°C for 1 min, 60°C for 1 min, and 68°C for 1 min, a final extension for 10 min at 68°C on a GeneAmp PCR System 9700 (Applied Biosystems, Foster City, CA).

PCR products were combined before running 100 µl of the pooled products on a 4% agarose gel at 80V for 2 hours. The ~450 bp bands were excised from the gel and purified using a QIAquick Gel Extraction Kit (Qiagen, Hilden, Germany) and eluted in 30 µl of elution buffer. Purified PCR products were quantified using a Qubit 2.0 Fluorometric High Sensitivity dsDNA Assay (Life Technologies, Carlsbad, CA).

## Library Preparation and Sequencing

Library preparation of the purified PCR products was performed using a KAPA LTP Library Preparation Kit (Kapa Biosystems, Wilmington, MA). The size integrity of the amplicon was validated with a 2100 Bioanalyzer (Agilent Technologies, Santa Clara, CA). High-throughput amplicon sequencing was conducted on a MiSeq (Illumina, San Diego, CA) using 2x300 paired-end fragments. The fastq sequences from the Illumina MiSeq were demultiplexed using Novobarcode (Novocrat Technologies, Selangor, Malaysia) and the 5'-pads and primers were trimmed from each read.

Bacterial taxa were determined by clustering the 16S rRNA sequences into operational taxonomical units (OTUs) using 97% similarity, taxonomy was assigned at the genus level using the SILVA 123 (43) database as reference, excluding samples with less than 1000 reads.
